# Supplementary material for: Transcranial optogenetic brain modulator for precise bimodal neuromodulation in multiple brain regions
Source: PubMed Central journal article supplement — Nat Commun. 2024 Nov 30;15:10423. doi: 10.1038/s41467-024-54759-0 (PMC11607408; doi:10.1038/s41467-024-54759-0), 2024-11-30
Supplement: 41467_2024_54759_MOESM14_ESM.pdf [file 41467_2024_54759_MOESM14_ESM.pdf]

## Reporting Summary

Nature Portfolio wishes to improve the reproducibility of the work that we publish. This form provides structure for consistency and transparency in reporting. For further information on Nature Portfolio policies, see our [Editorial Policies](#) and the [Editorial Policy Checklist](#).

### Statistics

For all statistical analyses, confirm that the following items are present in the figure legend, table legend, main text, or Methods section.

- | n/a                                 | Confirmed                                                                                                                                                                                                                                                                                      |
|-------------------------------------|------------------------------------------------------------------------------------------------------------------------------------------------------------------------------------------------------------------------------------------------------------------------------------------------|
| <input type="checkbox"/>            | <input checked="" type="checkbox"/> The exact sample size ( $n$ ) for each experimental group/condition, given as a discrete number and unit of measurement                                                                                                                                    |
| <input type="checkbox"/>            | <input checked="" type="checkbox"/> A statement on whether measurements were taken from distinct samples or whether the same sample was measured repeatedly                                                                                                                                    |
| <input type="checkbox"/>            | <input checked="" type="checkbox"/> The statistical test(s) used AND whether they are one- or two-sided<br><i>Only common tests should be described solely by name; describe more complex techniques in the Methods section.</i>                                                               |
| <input checked="" type="checkbox"/> | <input type="checkbox"/> A description of all covariates tested                                                                                                                                                                                                                                |
| <input checked="" type="checkbox"/> | <input type="checkbox"/> A description of any assumptions or corrections, such as tests of normality and adjustment for multiple comparisons                                                                                                                                                   |
| <input type="checkbox"/>            | <input checked="" type="checkbox"/> A full description of the statistical parameters including central tendency (e.g. means) or other basic estimates (e.g. regression coefficient) AND variation (e.g. standard deviation) or associated estimates of uncertainty (e.g. confidence intervals) |
| <input type="checkbox"/>            | <input checked="" type="checkbox"/> For null hypothesis testing, the test statistic (e.g. $F$ , $t$ , $r$ ) with confidence intervals, effect sizes, degrees of freedom and $P$ value noted<br><i>Give <math>P</math> values as exact values whenever suitable.</i>                            |
| <input checked="" type="checkbox"/> | <input type="checkbox"/> For Bayesian analysis, information on the choice of priors and Markov chain Monte Carlo settings                                                                                                                                                                      |
| <input type="checkbox"/>            | <input checked="" type="checkbox"/> For hierarchical and complex designs, identification of the appropriate level for tests and full reporting of outcomes                                                                                                                                     |
| <input checked="" type="checkbox"/> | <input type="checkbox"/> Estimates of effect sizes (e.g. Cohen's $d$ , Pearson's $r$ ), indicating how they were calculated                                                                                                                                                                    |

*Our web collection on [statistics for biologists](#) contains articles on many of the points above.*

### Software and code

Policy information about [availability of computer code](#)

Data collection

Data analysis

For manuscripts utilizing custom algorithms or software that are central to the research but not yet described in published literature, software must be made available to editors and reviewers. We strongly encourage code deposition in a community repository (e.g. GitHub). See the Nature Portfolio [guidelines for submitting code & software](#) for further information.

### Data

Policy information about [availability of data](#)

All manuscripts must include a [data availability statement](#). This statement should provide the following information, where applicable:

- Accession codes, unique identifiers, or web links for publicly available datasets
- A description of any restrictions on data availability
- For clinical datasets or third party data, please ensure that the statement adheres to our [policy](#)

The authors declare that all data supporting the findings of this study are available within the article and its supplementary information files. Source data are provided with this paper.

## Research involving human participants, their data, or biological material

Policy information about studies with [human participants or human data](#). See also policy information about [sex, gender \(identity/presentation\), and sexual orientation](#) and [race, ethnicity and racism](#).

|                                                                    |                                                                                     |
|--------------------------------------------------------------------|-------------------------------------------------------------------------------------|
| Reporting on sex and gender                                        | This study does not involve human participants, their data, or biological material. |
| Reporting on race, ethnicity, or other socially relevant groupings | This study does not involve human participants, their data, or biological material. |
| Population characteristics                                         | This study does not involve human participants, their data, or biological material. |
| Recruitment                                                        | This study does not involve human participants, their data, or biological material. |
| Ethics oversight                                                   | This study does not involve human participants, their data, or biological material. |

Note that full information on the approval of the study protocol must also be provided in the manuscript.

## Field-specific reporting

Please select the one below that is the best fit for your research. If you are not sure, read the appropriate sections before making your selection.

Life sciences       Behavioural & social sciences       Ecological, evolutionary & environmental sciences

For a reference copy of the document with all sections, see [nature.com/documents/nr-reporting-summary-flat.pdf](https://nature.com/documents/nr-reporting-summary-flat.pdf)

## Life sciences study design

All studies must disclose on these points even when the disclosure is negative.

|                 |                                                                                                                                                                                                                                                                                                                                                                                                                                                                                                                                                                                                                                                                                                                                                                                                                                                                                                                                                                                                                                                        |
|-----------------|--------------------------------------------------------------------------------------------------------------------------------------------------------------------------------------------------------------------------------------------------------------------------------------------------------------------------------------------------------------------------------------------------------------------------------------------------------------------------------------------------------------------------------------------------------------------------------------------------------------------------------------------------------------------------------------------------------------------------------------------------------------------------------------------------------------------------------------------------------------------------------------------------------------------------------------------------------------------------------------------------------------------------------------------------------|
| Sample size     | <p>Sample size is indicated in the figure legend for each experiment. We did not use a computational method to determine sample size. We chose based on previous experience with signal and behaviour analysis from behaving animals and determined sample size to be appropriate based on the consistency and magnitude of measurable differences in experiments.</p> <p>References:<br/>           1) Shin, H. et al. Interference-free, lightweight wireless neural probe system for investigating brain activity during natural competition. <i>Biosens Bioelectron</i> 195, 113665 (2022). <a href="https://doi.org/10.1016/j.bios.2021.113665">https://doi.org/10.1016/j.bios.2021.113665</a><br/>           2) Yoon, Y., Shin, H., Byun, D. et al. Neural probe system for behavioral neuropharmacology by bi-directional wireless drug delivery and electrophysiology in socially interacting mice. <i>Nat Commun</i> 13, 5521 (2022). <a href="https://doi.org/10.1038/s41467-022-33296-8">https://doi.org/10.1038/s41467-022-33296-8</a></p> |
| Data exclusions | No data were excluded.                                                                                                                                                                                                                                                                                                                                                                                                                                                                                                                                                                                                                                                                                                                                                                                                                                                                                                                                                                                                                                 |
| Replication     | All experiments were repeated independently at least three times with similar result. All replicates were successfully performed.                                                                                                                                                                                                                                                                                                                                                                                                                                                                                                                                                                                                                                                                                                                                                                                                                                                                                                                      |
| Randomization   | Samples were randomly assigned to experiments.                                                                                                                                                                                                                                                                                                                                                                                                                                                                                                                                                                                                                                                                                                                                                                                                                                                                                                                                                                                                         |
| Blinding        | All data supporting the findings of this study are available within the article and its supplementary files. Any additional requests for information can be directed to, and will be fulfilled by, the corresponding authors. Source data are provided with this paper.                                                                                                                                                                                                                                                                                                                                                                                                                                                                                                                                                                                                                                                                                                                                                                                |

## Reporting for specific materials, systems and methods

We require information from authors about some types of materials, experimental systems and methods used in many studies. Here, indicate whether each material, system or method listed is relevant to your study. If you are not sure if a list item applies to your research, read the appropriate section before selecting a response.

## Materials &amp; experimental systems

## Methods

|                                     |                                                                 |
|-------------------------------------|-----------------------------------------------------------------|
| n/a                                 | Involvement in the study                                        |
| <input type="checkbox"/>            | <input checked="" type="checkbox"/> Antibodies                  |
| <input checked="" type="checkbox"/> | <input type="checkbox"/> Eukaryotic cell lines                  |
| <input checked="" type="checkbox"/> | <input type="checkbox"/> Palaeontology and archaeology          |
| <input type="checkbox"/>            | <input checked="" type="checkbox"/> Animals and other organisms |
| <input checked="" type="checkbox"/> | <input type="checkbox"/> Clinical data                          |
| <input checked="" type="checkbox"/> | <input type="checkbox"/> Dual use research of concern           |
| <input checked="" type="checkbox"/> | <input type="checkbox"/> Plants                                 |

|                                     |                                                 |
|-------------------------------------|-------------------------------------------------|
| n/a                                 | Involvement in the study                        |
| <input checked="" type="checkbox"/> | <input type="checkbox"/> ChIP-seq               |
| <input checked="" type="checkbox"/> | <input type="checkbox"/> Flow cytometry         |
| <input checked="" type="checkbox"/> | <input type="checkbox"/> MRI-based neuroimaging |

## Antibodies

|                 |                                                                                                                                                                                                                                                                                                                                                                                                                                                                                                                                                                                                                                                                                                       |
|-----------------|-------------------------------------------------------------------------------------------------------------------------------------------------------------------------------------------------------------------------------------------------------------------------------------------------------------------------------------------------------------------------------------------------------------------------------------------------------------------------------------------------------------------------------------------------------------------------------------------------------------------------------------------------------------------------------------------------------|
| Antibodies used | We used anti-c-Fos antibody (Santa Cruz Biotechnology, SC-52G, 1:500) and Alexa Fluor 647 conjugated donkey anti-rabbit antibody (Jackson Immuno Research, 711-605-152, 1:500).                                                                                                                                                                                                                                                                                                                                                                                                                                                                                                                       |
| Validation      | Antibody validation was confirmed with each manufacturer. The anti-c-Fos antibody (Santa Cruz Biotechnology, SC-52-G, polyclonal, rabbit IgG) is recommended for detecting c-Fos in mouse, rat, and human samples and is validated for immunohistochemistry (IHC) and immunofluorescence (IF) applications. The secondary antibody, Alexa Fluor 647-conjugated donkey anti-rabbit IgG (Jackson Immuno Research, 711-605-152, polyclonal), is specific for IgG (H+L) and exhibits minimal cross-reactivity with serum proteins from bovine, chicken, goat, guinea pig, Syrian hamster, horse, human, mouse, rat, and sheep. This secondary antibody is affinity-purified and has the RRID: AB_2492288. |

## Animals and other research organisms

Policy information about [studies involving animals](#); [ARRIVE guidelines](#) recommended for reporting animal research, and [Sex and Gender in Research](#)

|                         |                                                                                                                                                                                                                                                                                                                            |
|-------------------------|----------------------------------------------------------------------------------------------------------------------------------------------------------------------------------------------------------------------------------------------------------------------------------------------------------------------------|
| Laboratory animals      | Adult male C57BL/6J mice (8 weeks of age; average weight of 30 g) were used in this study. Five or six mice were housed in a cage that had a 12:12 light-dark cycle and the temperature and humidity of the animal facility were maintained at 22±2°C and 50±5%. The number of mice used is specified for each experiment. |
| Wild animals            | No wild animals were used in the study.                                                                                                                                                                                                                                                                                    |
| Reporting on sex        | Only male mice were used in this study. Sex was not considered a variable in the study design.                                                                                                                                                                                                                             |
| Field-collected samples | No field collected samples were used in the study.                                                                                                                                                                                                                                                                         |
| Ethics oversight        | All of the procedures, including the use of animals, were approved by the Korea Institute of Science and Technology (KIST) in Seoul, Korea, and the procedures were conducted in accordance with the ethical standards stated in the Animal Care and Use Guidelines of KIST.                                               |

Note that full information on the approval of the study protocol must also be provided in the manuscript.

## Plants

|                       |                                     |
|-----------------------|-------------------------------------|
| Seed stocks           | This study does not involve Plants. |
| Novel plant genotypes | This study does not involve Plants. |
| Authentication        | This study does not involve Plants. |
